# Supplementary material for: Upcycling of lithium cobalt oxide to LiNi1/3Mn1/3Co1/3O2
Source: Royal Society of Chemistry journal article supplement (doi:10.1039/d4su00131a), 2024-01-01
Supplement: d4su00131a1.pdf [file d4su00131a1.pdf]

## Supplementary information

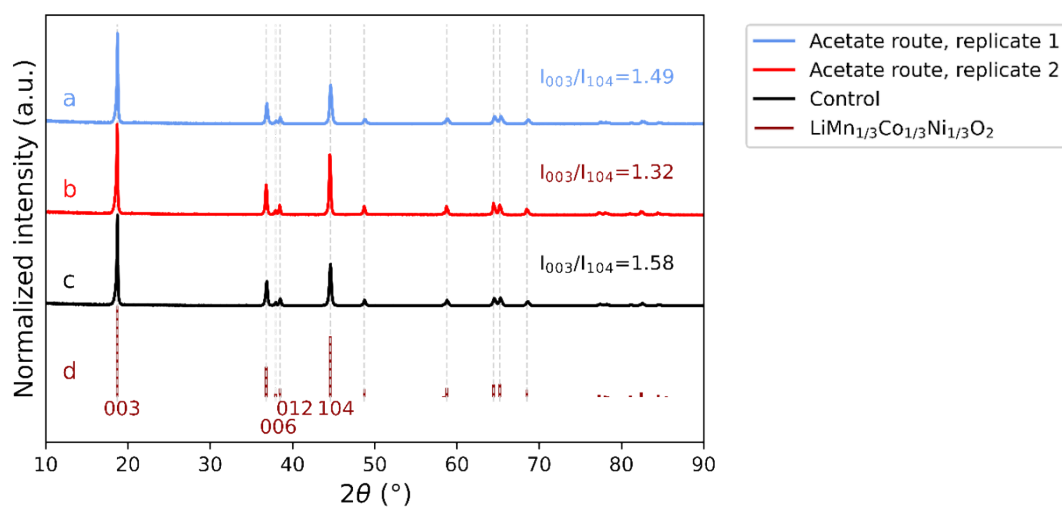

**Figure S1.** Normalized X-ray diffraction pattern from 10 to 90°  $2\theta$  for samples from the acetate route with (a) replicate 1, (b) replicate 2 and (c) a control NMC111 sample. In (d) diffraction peaks of NMC111 (ICDD: 04-014-7636) with indexation of relevant peaks are shown.
